# Supplementary material for: Rac1 Is a Novel Regulator of Contraction-Stimulated Glucose Uptake in Skeletal Muscle
Source: PubMed Central journal article supplement — Diabetes. 2013 Mar 14;62(4):1139–51. doi: 10.2337/db12-0491 (PMC3609592; doi:10.2337/db12-0491), 2013-03-14

SUPPLEMENTARY DATA

**Supplementary Figure 1.** A) Bar graph showing mean S.E.M of initial force production (mN) in incubated electrically-stimulated soleus and EDL muscles +/- 200  $\mu$ M NSC 23766, 1 h pre-incubation (n=12) or +/- 10  $\mu$ M Rac1 Inhibitor II (Inhib II), 1 h pre-incubation (n=10). B) Bar graph showing mean S.E.M of initial force production (mN) in incubated electrically-stimulated soleus and EDL muscles of muscle specific inducible Rac1 knockout (KO) mice and WT controls (n=11-13). C) Bar graph showing mean S.E.M of initial force production (mN) in incubated electrically-stimulated soleus and EDL muscles EDL +/- 10 (n=9-19) or 1 (n= 6-12)  $\mu$ M Latrunculin B, 1 h pre-incubation. Statistical significance between DMSO and Inhibitor condition is indicated by \*\*/\*\* (p<0.01/0.001).

A)

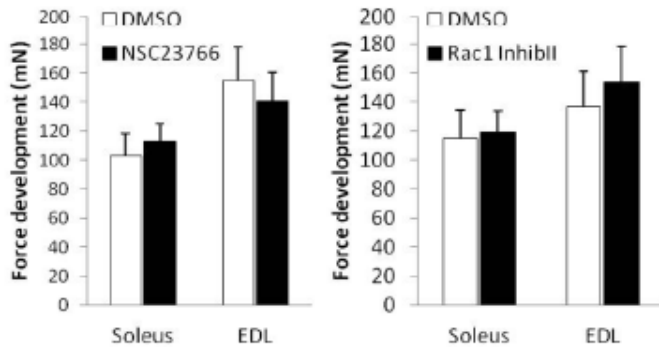

B)

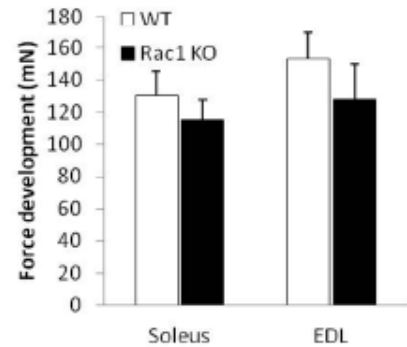

C)

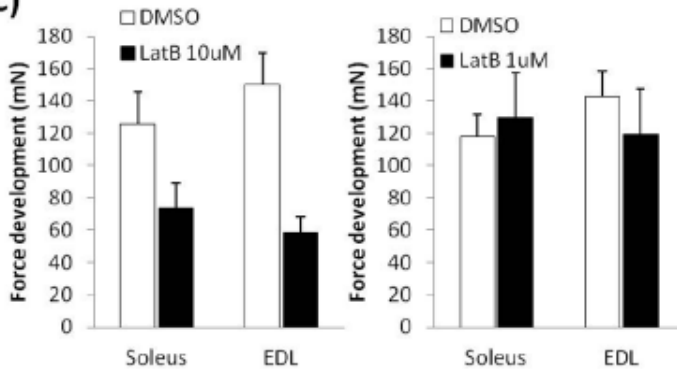

Supplement: supp_db12-0491_DB120491SupplementaryData.pdf [file supp_db12-0491_DB120491SupplementaryData.pdf]
